# Supplementary material
Source: MDPI journal article supplement (https://www.mdpi.com/1999-4907/11/12/1344)
Supplement: s1 [file s1]

## Sheet: COMPLETE DATASET
Mean ± se
Populations	Code pop.	LMA (g m-2)	LA (cm2)	πo (Mpa)	ψTLP (MaP)	RWCTLP (%)	ε (Mpa)	Proline (mmol g-1)	πo (Mpa)	ψTLP (MaP)	RWCTLP (%)	ε (Mpa)	Proline (mmol g-1)
				Control	Control	Control	Control	Control	Water Stressed	Water Stressed	Water Stressed	Water Stressed	Water Stressed
		n = 60	n = 60	n = 5	n = 5	n = 5	n = 5	n = 3	n = 5	n = 5	n = 5	n = 5	n = 4
Dar Fatma	DF	148 ± 1	7.9 ± 0.1	-1.24 ± 0.03	-1.77 ± 0.02	92.5 ± 0.3	4.91 ± 0.26	5.23 ± 0.24	-1.79 ± 0.03	-2.88 ± 0.1	88.6 ± 0.7	7.35 ± 0.23	11.88 ± 0.29
Echihia( Ain Zana)	E	113 ± 1	9.3 ± 0.1	-1.41 ± 0.03	-1.71 ± 0.05	94.5 ± 0.6	3.59 ± 0.18	5.57 ± 0.09	-1.73 ± 0.04	-2.47 ± 0.06	88.4 ± 0.5	4.66 ± 0.23	9.65 ± 0.46
El Feija	EF	119 ± 1	9.2 ± 0.1	-1.48 ± 0.03	-1.79 ± 0.04	94.6 ± 0.4	3.71 ± 0.14	5.4 ± 0.15	-2.28 ± 0.08	-3.07 ± 0.07	87.8 ± 0.6	5.01 ± 0.19	10.7 ± 0.34
Babouch	Bab	124 ± 1	7.6 ± 0.1	-1.29 ± 0.04	-1.86 ± 0.03	90.2 ± 0.4	4.01 ± 0.2	4.92 ± 0.02	-1.76 ± 0.03	-2.78 ± 0.04	88 ± 0.1	6.07 ± 0.19	11.71 ± 0.13
Megen Sef	MS	190 ± 4	7.8 ± 0.1	-1.48 ± 0.03	-2.04 ± 0.04	92.5 ± 0.3	5.11 ± 0.15	5.13 ± 0.19	-2.44 ± 0.07	-3.29 ± 0.08	89.1 ± 0.4	5.94 ± 0.13	16.37 ± 0.32
Beni Mtir	BM	122 ± 1	7.7 ± 0.1	-1.5 ± 0.03	-2.09 ± 0.1	92.7 ± 0.7	5.35 ± 0.4	5.3 ± 0.23	-1.82 ± 0.03	-2.6 ± 0.04	91.1 ± 0.6	6.7 ± 0.37	9.45 ± 0.33
Jebel Khroufa (Ouchtata)	O	137 ± 1	7.7 ± 0.1	-1.3 ± 0.04	-1.92 ± 0.07	90.2 ± 0.6	4.24 ± 0.13	5.27 ± 0.17	-1.65 ± 0.05	-2.87 ± 0.05	87.2 ± 0.3	7.19 ± 0.13	9.63 ± 0.28
Jebel Jouza	JJ	135 ± 4	6.3 ± 0.1	-1.41 ± 0.01	-2.04 ± 0.04	90.1 ± 0.2	4.54 ± 0.29	5.49 ± 0.2	-1.92 ± 0.05	-3.16 ± 0.04	80.9 ± 0.7	4.88 ± 0.37	11.65 ± 0.18
Aïn Snoussi	AS	138 ± 1	9.3 ± 0.2	-1.26 ± 0.02	-1.87 ± 0.04	91.9 ± 0.2	5.06 ± 0.34	6.21 ± 0.24	-1.66 ± 0.02	-2.72 ± 0.04	88.8 ± 0.6	6.81 ± 0.21	11.29 ± 0.27
Hammam Bourguiba	HB	127 ± 1	7 ± 0.1	-1.27 ± 0.03	-1.72 ± 0.03	91.7 ± 0.5	3.86 ± 0.26	5.84 ± 0.39	-1.72 ± 0.03	-2.39 ± 0.04	89 ± 0.6	4.66 ± 0.17	12.05 ± 0.43
Bellif	Bl	137 ± 1	8.2 ± 0.1	-1.29 ± 0.05	-1.8 ± 0.03	92.2 ± 0.4	4.44 ± 0.22	5.59 ± 0.24	-1.87 ± 0.01	-2.63 ± 0.03	90.8 ± 0.2	6.2 ± 0.29	13.3 ± 0.33
Ras rajel	Rr	162 ± 5	4 ± 0.1	-1.59 ± 0.03	-2.34 ± 0.05	89.6 ± 0.8	5.27 ± 0.39	5.94 ± 0.11	-1.76 ± 0.06	-3.09 ± 0.05	87.3 ± 0.6	7.8 ± 0.37	10.47 ± 0.21
Fernana	Frn	166 ± 5	6 ± 0.1	-1.38 ± 0.02	-2.38 ± 0.05	91.2 ± 0.3	7.91 ± 0.32	5.84 ± 0.1	-2.63 ± 0.02	-3.59 ± 0.07	90.4 ± 0.4	7.51 ± 0.32	16.41 ± 0.24
Kef er rennd	Ker	243 ± 5	2.4 ± 0.1	-1.5 ± 0.03	-2.38 ± 0.04	91.9 ± 0.2	7.86 ± 0.18	5.78 ± 0.25	-1.88 ± 0.01	-3.85 ± 0.05	88.3 ± 0.4	13.38 ± 0.51	10.58 ± 0.18
Jebel Chehid,Ramlia	JCH	230 ± 5	2.7 ± 0.1	-1.48 ± 0.01	-2.35 ± 0.03	92.6 ± 0.3	8.66 ± 0.18	6.21 ± 0.29	-1.87 ± 0.02	-3.38 ± 0.06	90.2 ± 0.4	12.05 ± 0.43	10.42 ± 0.28
Hammem Jdidi	HJ	199 ± 1	3.7 ± 0.1	-1.21 ± 0.03	-2.15 ± 0.06	91.1 ± 0.4	7.63 ± 0.26	5.87 ± 0.2	-1.61 ± 0.01	-3.22 ± 0.12	90.2 ± 0.4	12.75 ± 0.67	10.56 ± 0.27

## Sheet: Abbreviations
	Abbreviation (units)	Leaf traits
	LMA (g m-2)	Leaf mass per area
	LA (cm2)	Leaf area
	πo (Mpa)	Osmotic potential at full turgor
	ψTLP (MaP)	Water potential at turgor loss point
	RWCTLP (%)	Relative water content at turgor loss point
	ε (Mpa)	Bulk modulus of elasticity

## Sheet: Supplementary Table S1
Population	MAI	Tree density (n ha−1 )	Diameter at Breast Height (m)	Maquis	Tree species	Reference
Dar Fatma	55.9	260	0.4	Phillyrea media, Erica arborea, Arbutus unedo, Myrtus communis, Anagallis tenella	Quercus suber, Quercus canariensis	El Mokni et al, 2019
Echihia (Ain Zana)	55	180	0.28	Erica arborea, Arbutus unedo, Myrtus communis	Quercus suber, Quercus canariensis, Quercus afares, Pinus spp.	Bellahirech et al, 2019
El Feija	51.2	160	0.29	Arbutus unedo, Erica arborea, Myrtus communis.	Quercus suber, Quercus canariensis	El Mokni et al, 2019
Babouch	43.3	150	0.32	Myrtus communis, Erica arborea, Daphne gnidium, Calycotome villosa	Quercus suber, Quercus canariensis, Pistacia lentiscus, Pinus spp.	El Mokni et al, 2019
Megen Sef	42.3	190		Myrtus communis, Erica arborea	Quercus suber, Quercus canariensis	Personal observation
Beni Mtir	39.4	220		Erica arborea, Arbutus unedo, Viburnum tinus	Quercus suber, Quercus canariensis, Populus nigra, Prunus avium, Celtis australis	Personal observation
JebelKhroufa (Ouchtata)	39.4	250	0.56	Crataegus monogyna; Salix spp., Erica arborea, Arbutus unedo, Viburnum tinus	Quercus suber, Quercus canariensis	Personal observation
Jebel Jouza	39.2	200	0.39	Myrtus communis, Erica arborea, Daphne gnidium, Calycotome villosa	Quercus suber, Quercus canariensis	Bellahirech et al, 2019
Aïn Snoussi	38.5	375	0.31	Erica arborea, Calycotome villosa	Quercus suber, Quercus canariensis, Pinus pinea, Phillyrea angustifolia	Bouzidi et al, 2020
Hammam Bourguiba	31	190	0.32	Phillyrea media, Erica arborea, Arbitus unedo, Myrtus communis, Smilax aspera	Quercus suber, Quercus canariensis	Personal observation
Bellif	27.8	220	0.86	Myrtus communis, Daphne gnidium, Calycotome villosa, Erica arborea, Cistus salviaefolius, Crataegus azarolus, Pteridium aquilinum	Quercus suber	Bellahirech et al, 2019
Ras rajel	27.5	200		Myrtus communis, Daphne gnidium, Calycotome villosa, Erica arborea, Cistus salviaefolius, Crataegus azarolus	Quercus suber, Quercus coccifera, Pistacia lentiscus, Olea europea	Personal observation
Fernana	26.5	200	0.25	Myrtus communis, Daphne gnidium, Calycotome villosa, Erica arborea, Cistus salviaefolius, Crataegus azarolus	Quercus suber, Quercus canariensis	Bellahirech et al, 2019
Kef er rennd	23.6	120		Calycotome villosa, Erica arborea, Cistus salviaefolius	Quercus suber, Quercus coccifera	Personal observation
Jebel Chehid,Ramlia	21.4	40	0.87	agroforestry system (containing olive trees)	Quercus suber, Quercus coccifera, Quercus ilex	Personal observation
Hammem Jdidi	15.9	180	0.73	Calycotome villosa, Erica arborea, Cistus salviaefolius	Quercus suber, Quercus coccifera	Personal observation

## Sheet: References Table S1
References
Bellahirech, A., Branco, M., Catry, F. X., Bonifácio, L., Sousa, E., & Jamâa, M. L. B. (2019). Site-and tree-related factors affecting colonization of cork oaks Quercus suber L. by ambrosia beetles in Tunisia. Annals of Forest Science, 76(2), 45.
Bouzidi, M., Nouri, M., Nasr, Z. et al. Contribution to the assessment of climate change effects on water balance in forest soil: application of the Biljou model to the cork oak forest of Ain Snoussi (north-western Tunisia). Arab J Geosci 13, 1152 (2020). https://doi.org/10.1007/s12517-020-06118-8
El Mokni Ridha (2019); Inventaire et identification de la la flore lichenique, mycolique ebryopphyte et vasculaire des forets des chênes (Quercus spp.)de Kmoumirie, nord-ouest de la Tunisie. Thèse de Doctorat, Faculté des Sciences de Bizerte, Université de Carthage 346p
